# Supplementary material
Source: Research Square preprint supplement (doi:10.21203/rs.3.rs-8156737/v1)
Supplement: Supplementary file 1 [file e2d2312868225c245ccf1d47.docx]

Supplementary Table S1. Baseline characteristics of the derivation and external validation cohorts.

| Variable | Category/Subgroup | N (%) or Median (Range) of Derivation | N (%) or Median (Range) of External validation |
| --- | --- | --- | --- |
| Age at brachytherapy | ＜ 40 | 58（22.0%） | 19（25.7%） |
|  | 40–49 | 48（18.2%） | 14（18.9%） |
|  | 50–59 | 60（22.8%） | 15（20.3%） |
|  | 60–69 | 59（22.4%） | 14（18.9%） |
|  | > 69 | 38（14.4%） | 12（16.2%） |
| Sex | Male | 123(46.8%) | 41（55.4%） |
|  | Female | 140 (53.2%) | 33（44.6%） |
| Pathological subtype | Mucoepidermoid carcinoma | 122(46.4%) | 35（47.3%） |
|  | Adenoid cystic carcinoma | 45 (17.1%) | 10（13.5%） |
|  | Acinic cell carcinoma | 35（13.3%） | 12（16.2%） |
|  | Myoepithelial Carcinoma | 21（8.0%） | 8（10.89%） |
|  | Carcinoma ex pleomorphic adenoma | 17（6.4%） | 0 |
|  | Epithelial-myoepithelial carcinoma | 8（3.0%） | 2（2.7%） |
|  | Salivary duct carcinoma | 8（3.0%） | 3（4.1%） |
|  | Others* | 7(2.7%) | 4（5.4%） |
| Laterality | Left | 135(51.3%) | 35（47.3%） |
|  | Right | 128 (48.7%) | 39（52.7%） |
| CTV (cm³) | Median (range) | 32.6 (9.5–131.8) | 29.7(10.1-91.6) |
| Anatomical site of primary lesion | Parotid gland | 228 (86.7%) | 59（79.7%） |
|  | Submandibular gland | 23 (8.7%) | 12（16.2%） |
|  | Minor salivary gland | 12 (4.6%) | 3（4.1%） |

*Other pathological subtypes included papillary cystadenocarcinoma and secretory carcinoma.
